# Supplementary material for: Metabolic versatility of Caldarchaeales from geothermal features of Hawai’i and Chile as revealed by five metagenome-assembled genomes
Source: Front Microbiol. 2023 Sep 20;14:1216591. doi: 10.3389/fmicb.2023.1216591 (PMC10547907; doi:10.3389/fmicb.2023.1216591)
Supplement: Supplementary file 10 [file Table_10.XLSX]

## Sheet: HMMHitNum
Category

## Sheet: FunctionHit
Category

## Sheet: KEGGModuleHit
Module.ID

## Sheet: KEGGModuleStepHit
Module.step

## Sheet: dbCAN2Hit
CAZyme.ID

## Sheet: MEROPSHit
MEROPS.peptidase.ID
